# Supplementary material
Source: MDPI journal article supplement (https://www.mdpi.com/2071-1050/14/18/11536)
Supplement: s1 [file s1 › Supplementary Figures.pdf]

**Supplementary Figure S1**

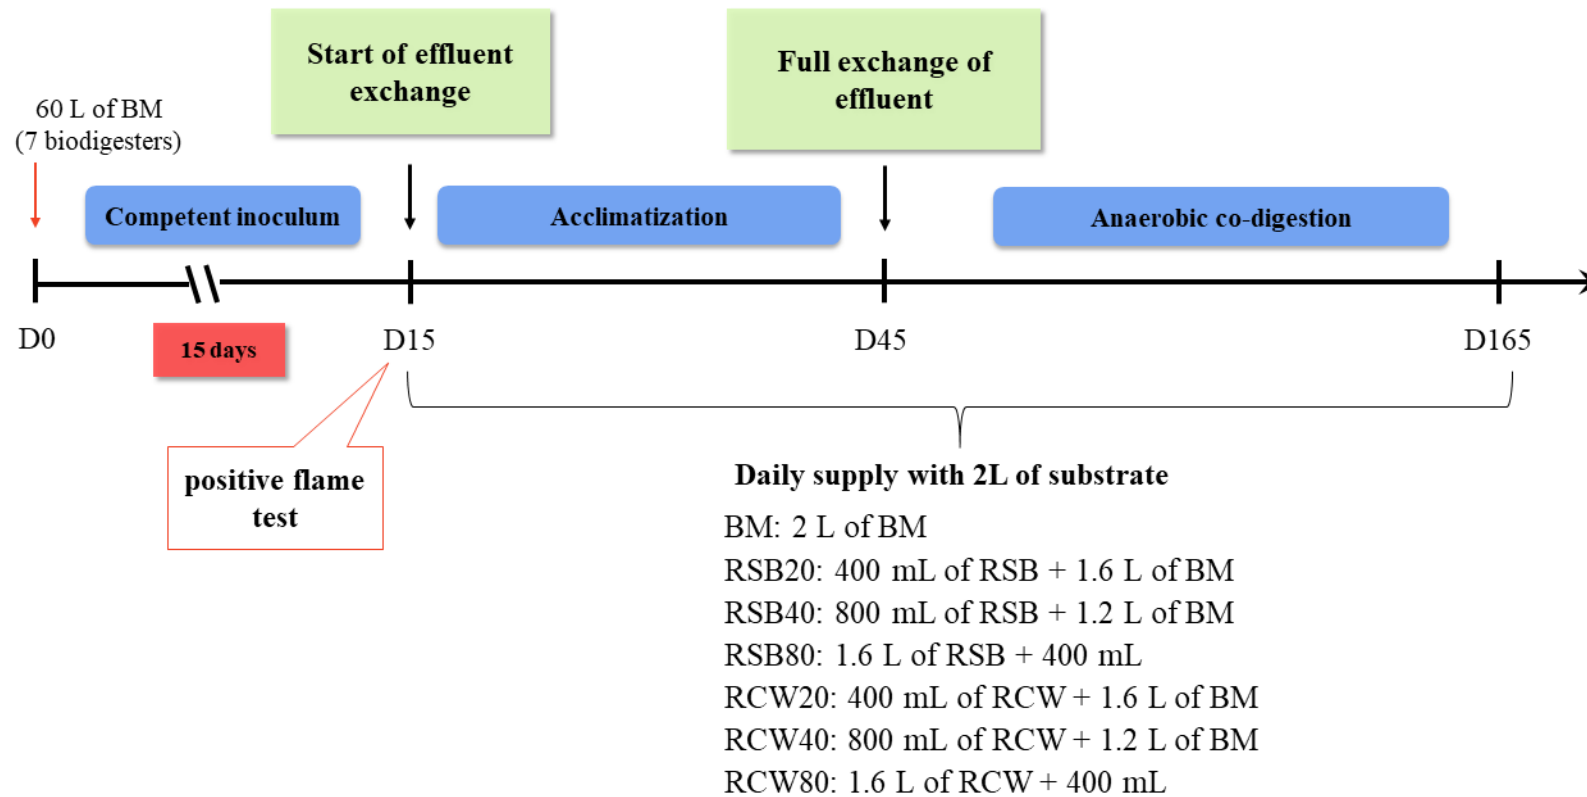

**Supplementary Figure S1.** Experimental design of the project. Biodigesters named according to the co-substrate concentration used.

## Supplementary Figure S2

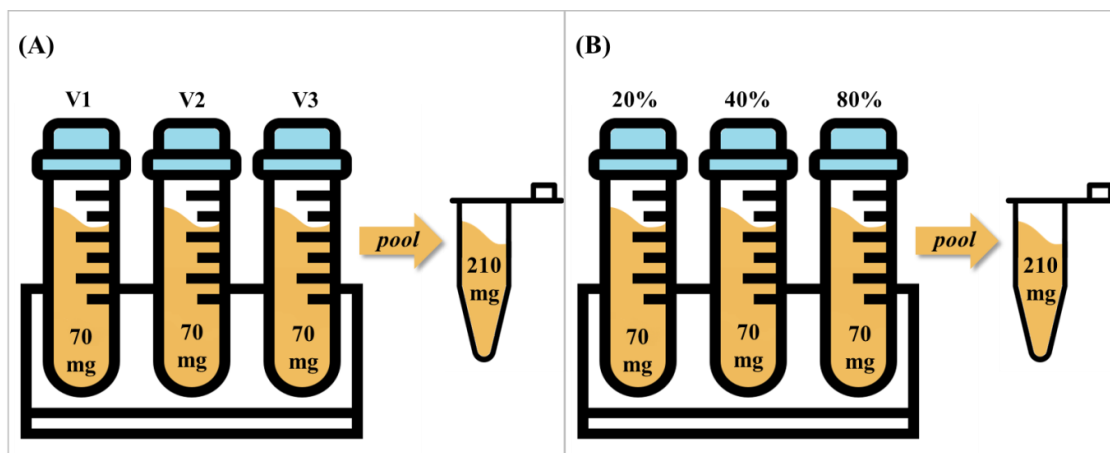

**Supplementary Figure S2.** Scheme of sample pooling preparation for DNA extraction. (A) Pooling of lyophilized effluents from 70 mg of the sample collected in each biodigester valve (V1, V2, and V3); (B) Pooling of lyophilized influents from 70 mg of each supply mixture sample (20%, 40%, and 80%).
