# Supplementary material
Source: MDPI journal article supplement (https://www.mdpi.com/2071-1050/14/18/11536)
Supplement: s1 [file s1 › Supplementary Table.xlsx]

## Sheet: OTU table
Supplementary Table S1. OTU table classified by genus level presenting the most abundant genera in influent and effluent samples. The column classified as "Others" contains OTUs that were not possible to be classified by gender or those with small numbers of representatives.
Sample ID	Methanobacterium	Methanobrevibacter	Methanosphaera	Methanocorpusculum	Methanoculleus	Candidatus Methanoregula	Methanolinea	Methanospirillum	Methanosaeta	Methanosarcina	Others
BM_IN	0	743	24	4	0	0	0	0	9	10	7
BM_E_F1	15	69	0	598	21	132	8	13	19	1530	172
BM_D001	22	83	0	349	9	121	38	49	85	3015	188
BM_D036	47	44	0	413	39	218	79	90	219	2374	334
BM_D078	47	35	0	150	33	136	123	161	541	250	320
BM_D099	81	81	0	127	47	149	115	191	1268	553	399
BM_D120	23	125	0	148	26	130	69	143	750	274	214
RSB_IN	0	1655	96	5	2	0	8	0	13	14	3
RSB20_D001	59	204	15	445	21	80	44	86	107	3953	236
RSB20_D036	40	103	11	1164	37	24	25	41	87	2704	136
RSB20_D078	24	100	0	2235	78	22	23	55	235	967	181
RSB20_D099	35	94	0	1183	65	9	0	45	309	1790	174
RSB20_D120	41	111	0	720	48	15	0	32	404	2052	196
RSB40_D001	86	288	23	3294	57	198	59	122	160	5647	370
RSB40_D036	91	146	24	1448	91	24	23	30	82	1051	95
RSB40_D078	28	501	43	161	51	6	11	13	62	214	69
RSB40_D099	11	694	50	97	17	0	8	6	60	518	39
RSB40_D120	0	1041	75	14	0	0	10	9	14	46	5
RSB80_D001	104	878	106	863	47	56	29	29	46	665	142
RSB80_D036	16	2335	104	205	13	0	5	0	15	471	56
RSB80_D078	7	537	42	21	0	0	0	0	0	36	18
RSB80_D099	31	571	65	15	0	0	0	0	6	24	44
RCW_IN	0	1234	17	0	0	0	8	3	13	23	18
RCW20_D001	104	128	0	1344	38	379	54	49	53	5196	539
RCW20_D036	69	47	0	242	24	159	47	40	131	1753	286
RCW20_D078	63	57	0	197	82	141	69	101	968	1309	290
RCW20_D099	119	70	4	241	78	176	115	125	1479	309	392
RCW20_D120	112	70	0	95	53	86	76	52	697	133	242
RCW40_D001	81	93	6	289	35	129	34	22	111	2359	308
RCW40_D036	39	0	0	137	68	154	49	27	323	632	164
RCW40_D078	120	37	0	87	56	90	63	63	773	397	190
RCW40_D099	115	46	0	71	32	42	68	55	1216	501	166
RCW40_D120	51	26	0	49	42	55	41	20	476	76	123
RCW80_D001	45	27	0	196	38	83	14	0	50	2767	124
RCW80_D036	44	6	0	117	35	62	8	8	205	999	86
RCW80_D078	60	16	0	69	46	37	28	0	613	409	84
RCW80_D099	53	14	0	59	44	22	40	46	2178	467	102
RCW80_D120	151	24	0	145	116	40	43	33	2377	498	194
